# Supplementary material for: Assessing the adequacy of traditional hydrological models for climate change impact studies: A case for long-short-term memory (LSTM) neural networks
Source: Copernicus journal article supplement (doi:10.5194/egusphere-2024-2133), 2024-08-05
Supplement: Supplementary file 1 [file egusphere-2024-2133-supplement.pdf]

*Supplement of*

# **Assessing the adequacy of traditional hydrological models for climate change impact studies: A case for long-short-term memory (LSTM) neural networks**

Jean-Luc Martel<sup>1</sup>, François Brissette<sup>1</sup>, Richard Arsenault<sup>1</sup>, Richard Turcotte<sup>2</sup>, Mariana Castañeda-Gonzalez<sup>1</sup>, William Armstrong<sup>1</sup>, Edouard Mailhot<sup>2</sup>, Jasmine Pelletier-Dumont<sup>2</sup>, Gabriel Rondeau-Genesse<sup>3</sup>, Louis-Philippe Caron<sup>3</sup>

<sup>1</sup>Hydrology, Climate and Climate Change (HC3) laboratory, École de technologie supérieure, Montreal, Canada, H3C 1K3

10 <sup>2</sup>Direction principale de l'expertise hydrique (DPEH), Ministère de l'Environnement et de la Lutte contre les changements climatiques, de la Faune et des Parcs (MELCCFP), Quebec, Canada, G1R 5V7

<sup>3</sup>Ouranos, Montreal, Canada, H3A 1B9

*Correspondence to:* Jean-Luc Martel (jean-luc.martel@etsmtl.ca)

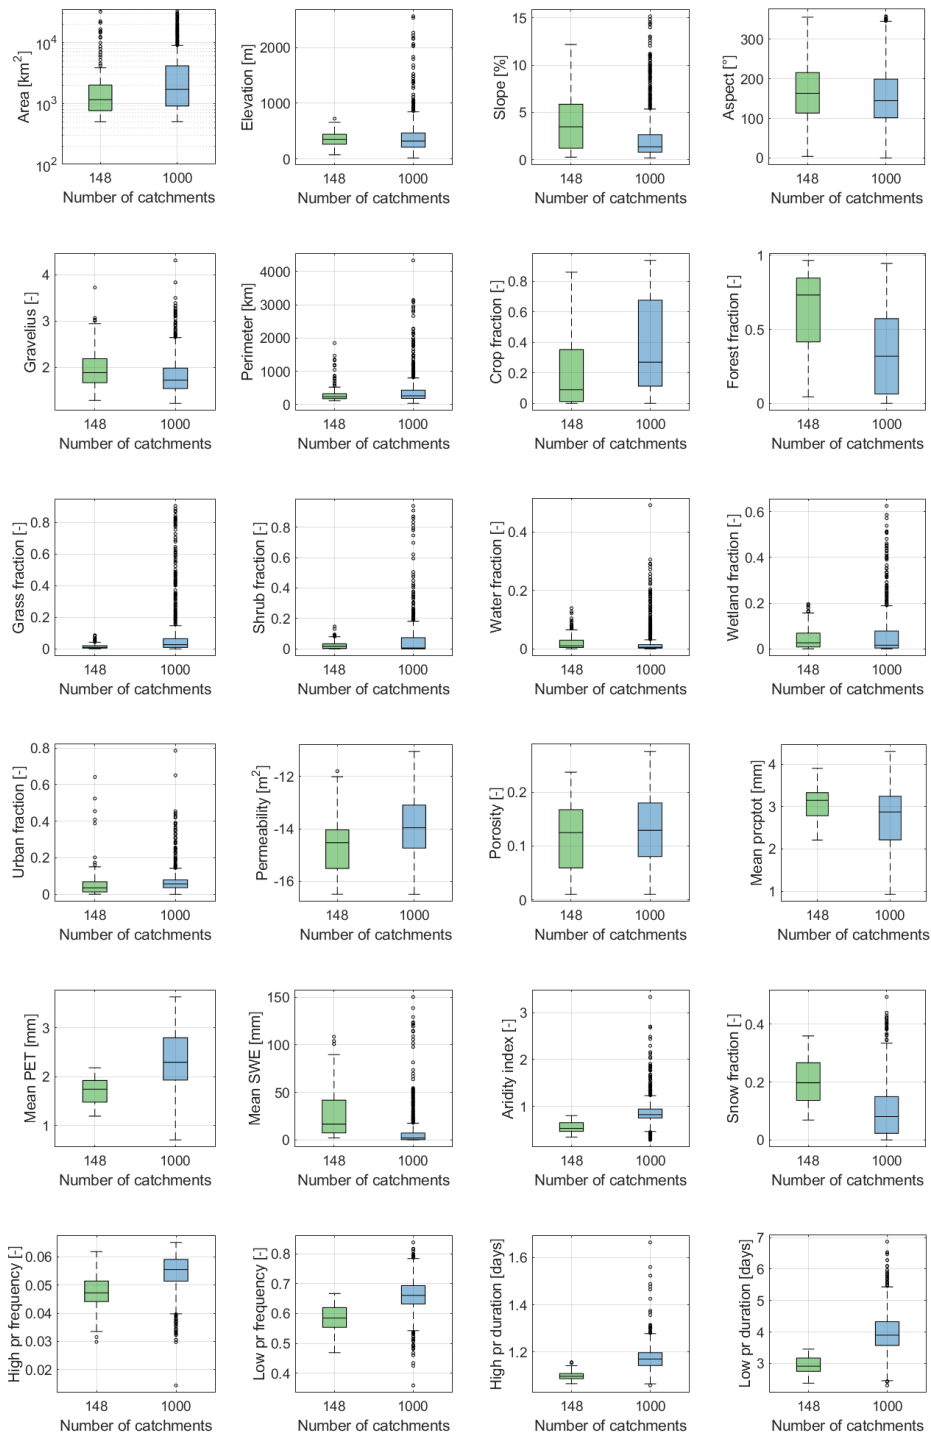

15

**Figure S1: Catchment descriptors for the 148 catchments of this study and for the 1,000 extra donors catchments for the extended LSTM-based model.**

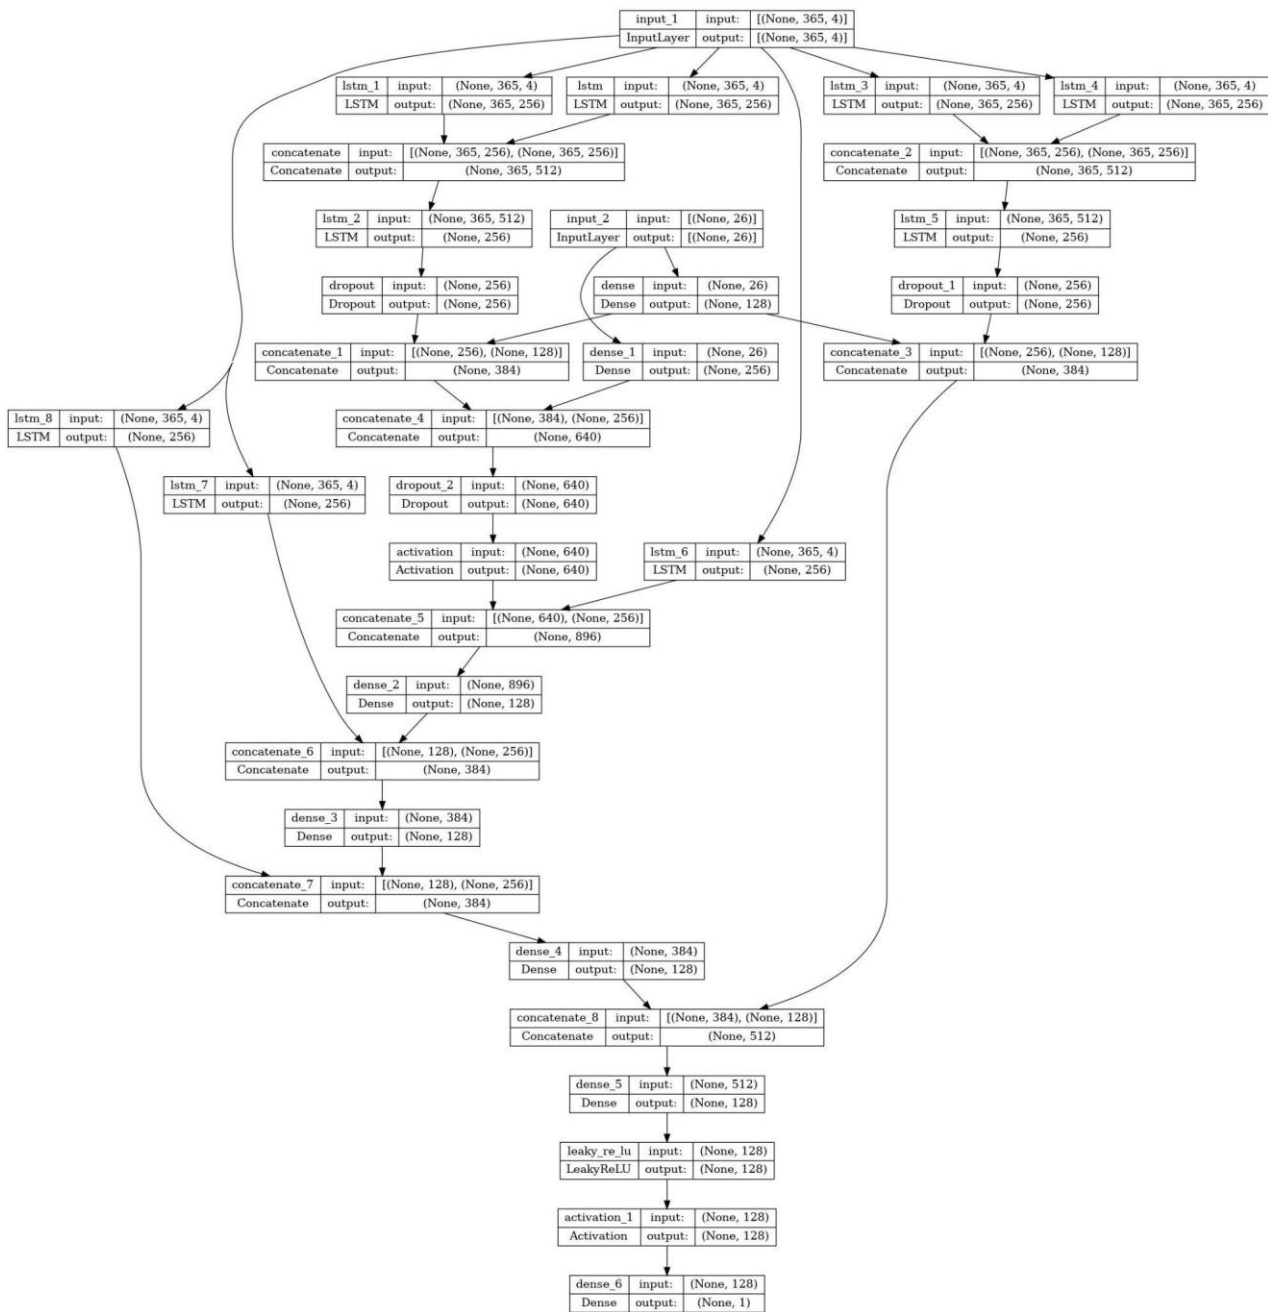

Figure S2: LSTM-based model structure developed and implemented in this study.

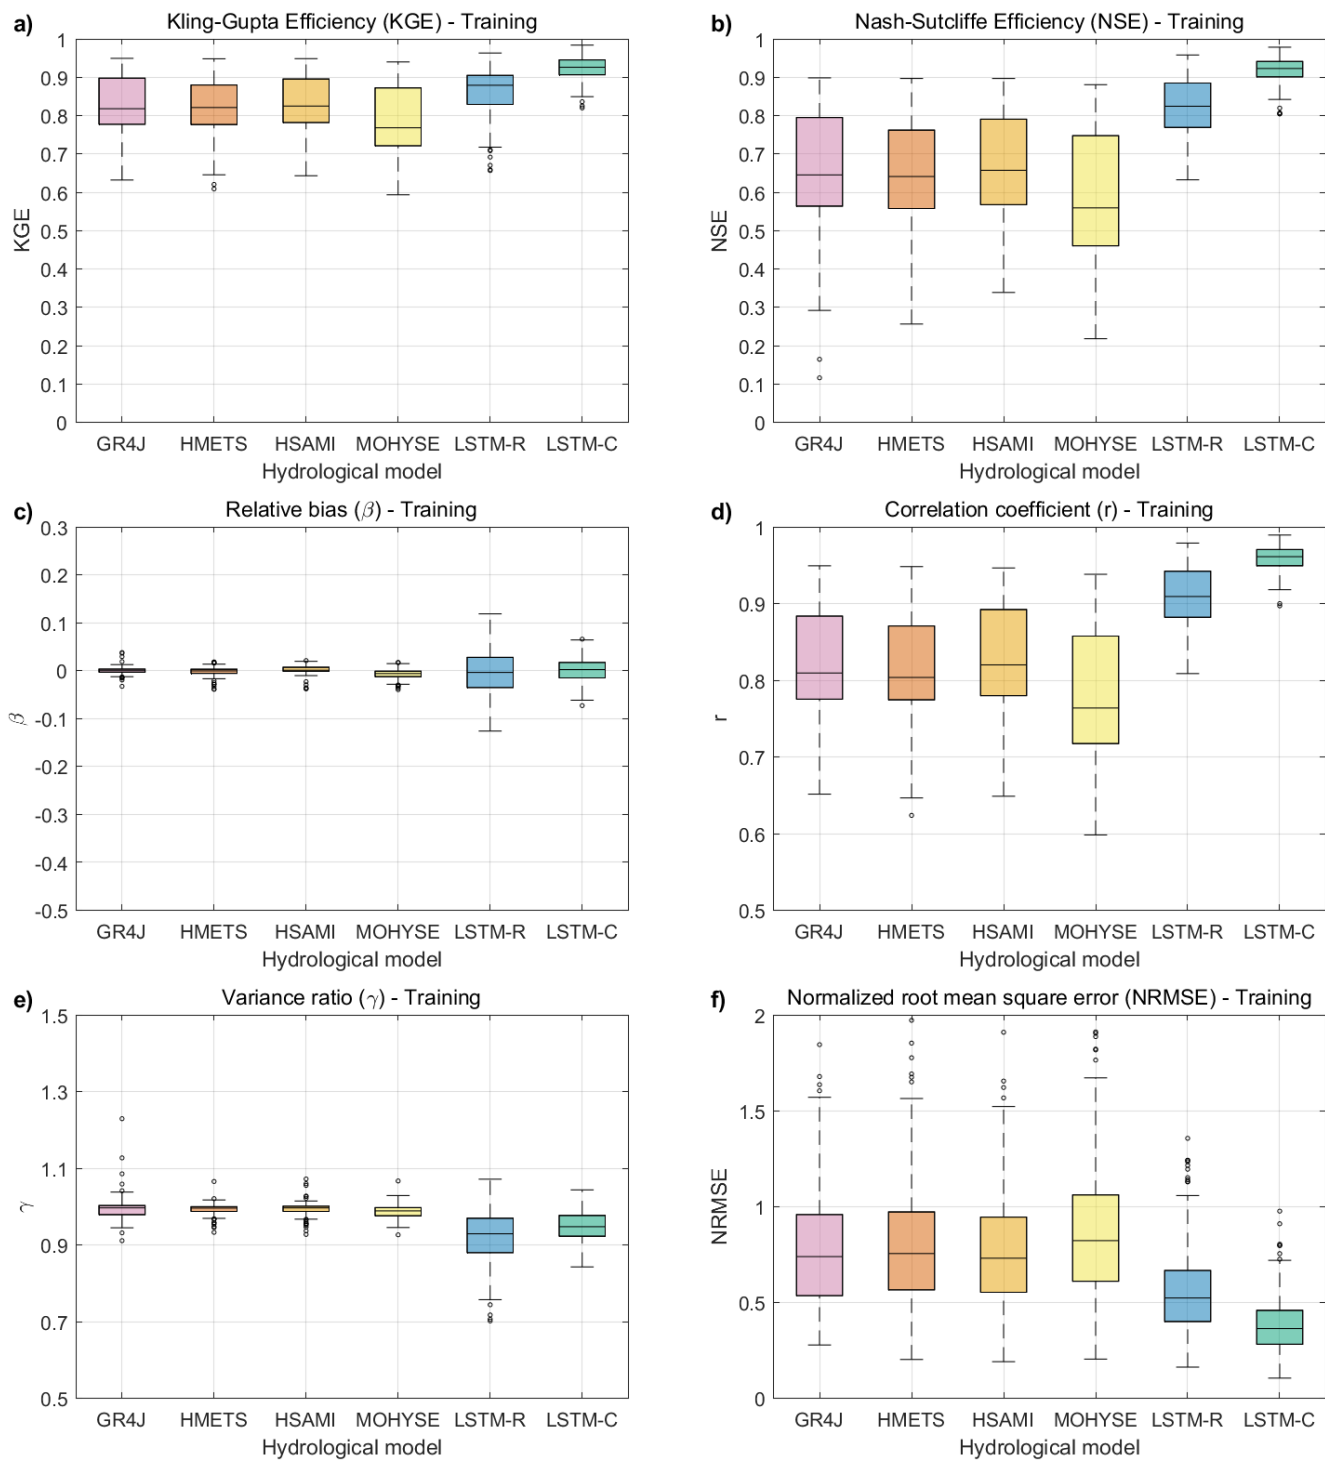

**Figure S3: Kling-Gupta Efficiency (KGE; a), Nash-Sutcliffe Efficiency (NSE; b), relative bias ( $\beta$ ; c), correlation coefficient ( $r$ ; d), variance ratio ( $\gamma$ ; e), and normalized root mean square error (NRSME; f) metrics over the independent 5-year training period (1983-2002).**

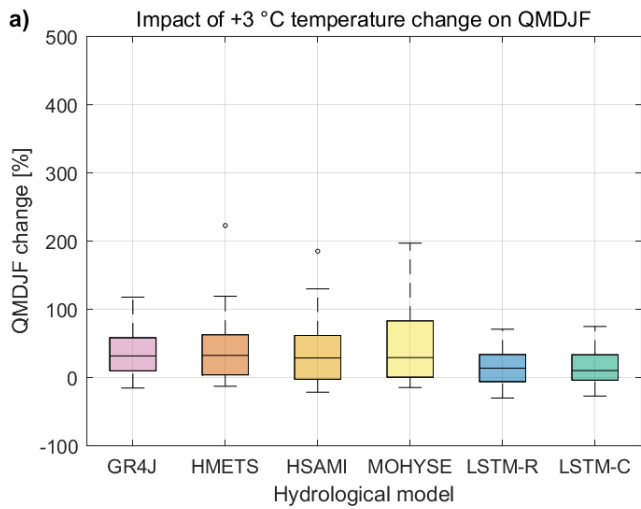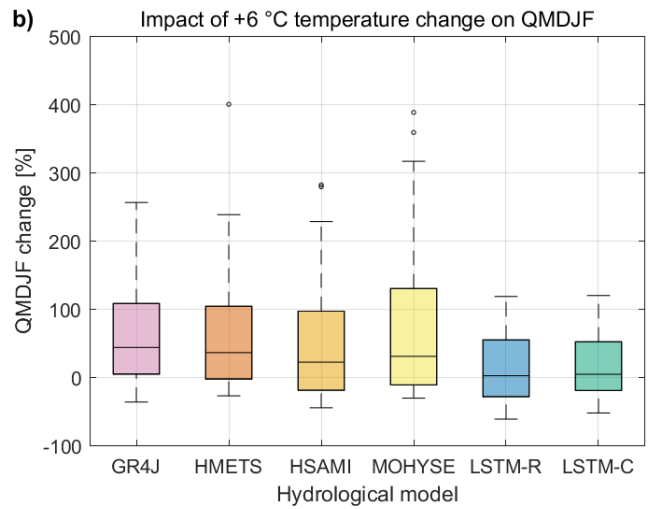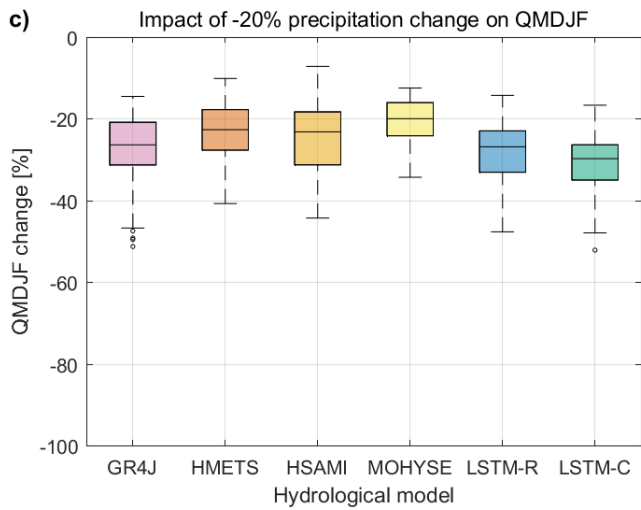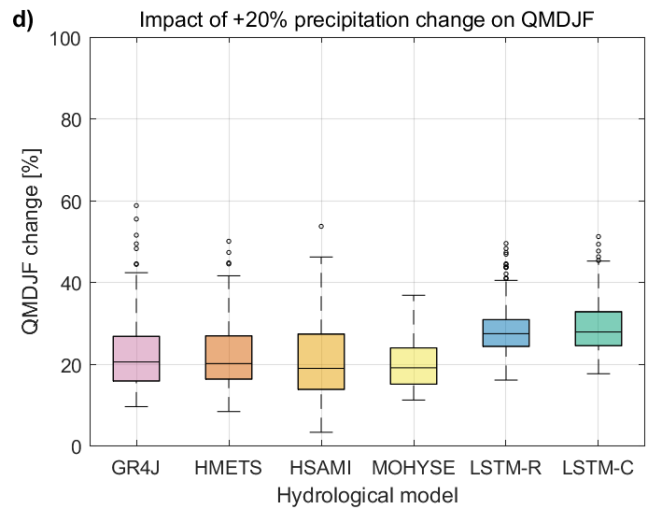

**Figure S4: Projected mean winter streamflow (QMDJF) changes for the 4 sensitivity scenarios: temperature increase of +3 °C (a) and +6 °C (b) and precipitation relative change of -20% (c) and +20% (d).**

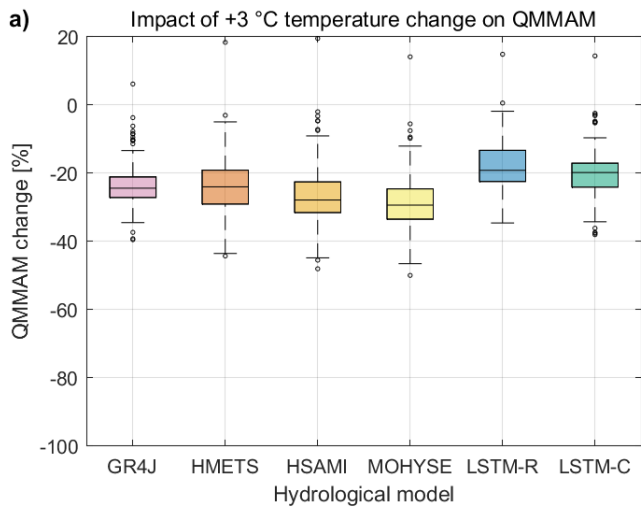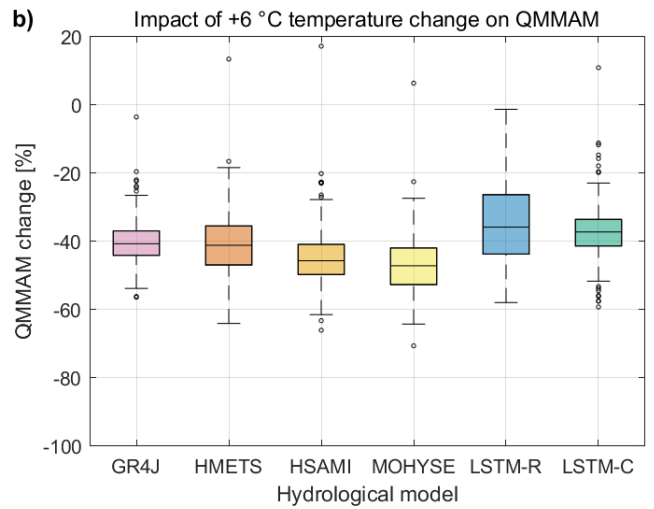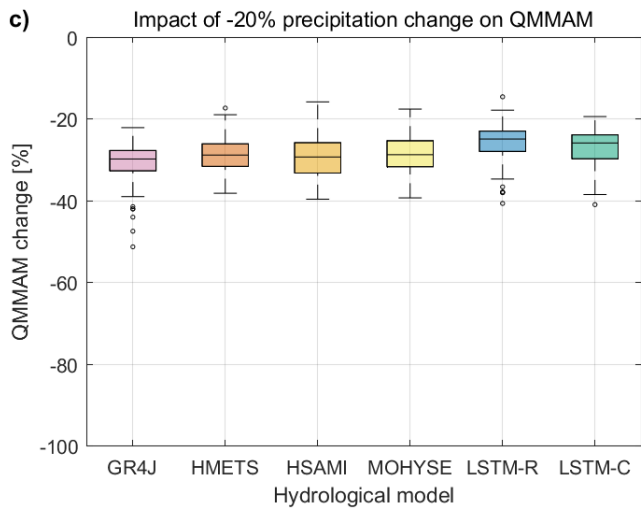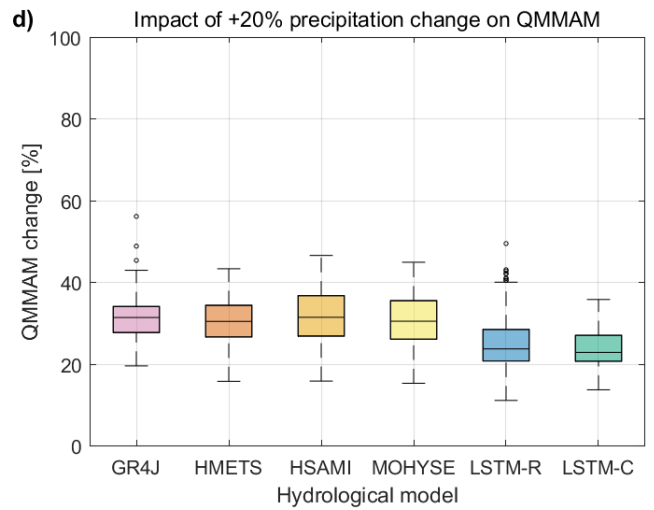

**Figure S5: Same as Figure S4, but for mean spring streamflow (QMMAM).**

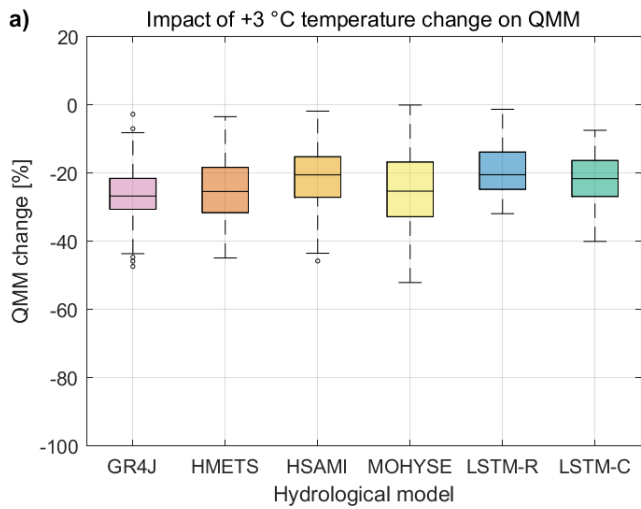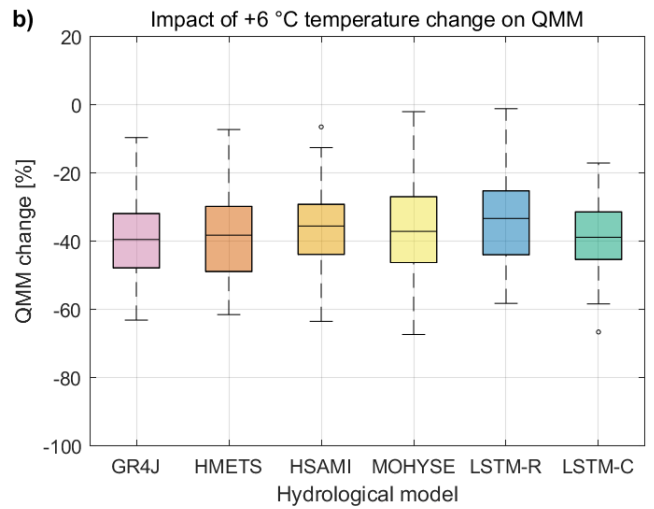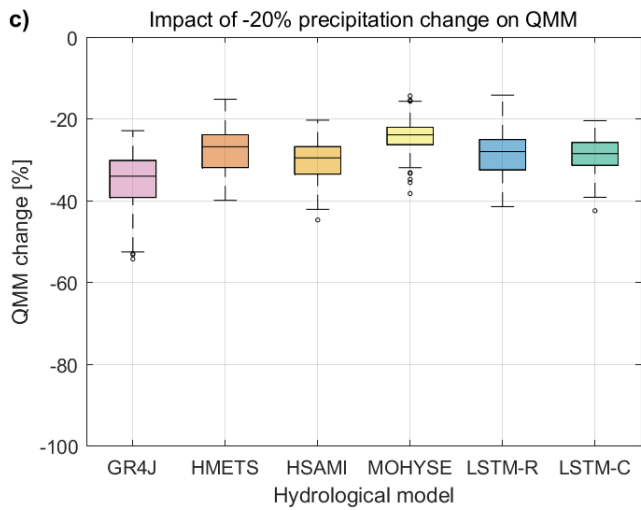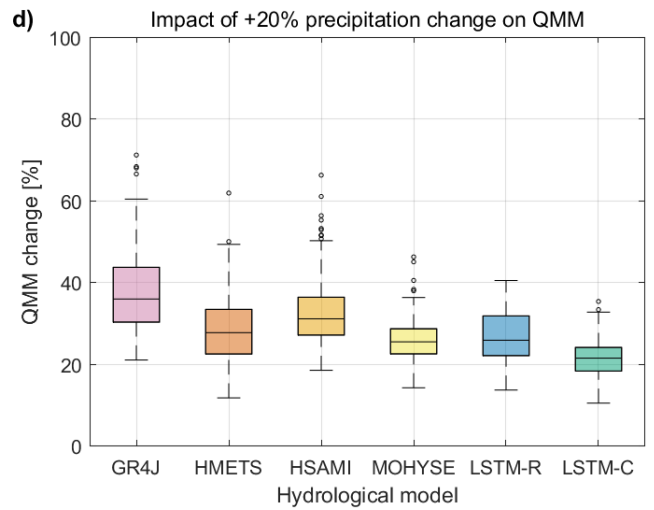

**Figure S6: Same as Figure S4, but for mean annual maximum streamflow (QMM).**

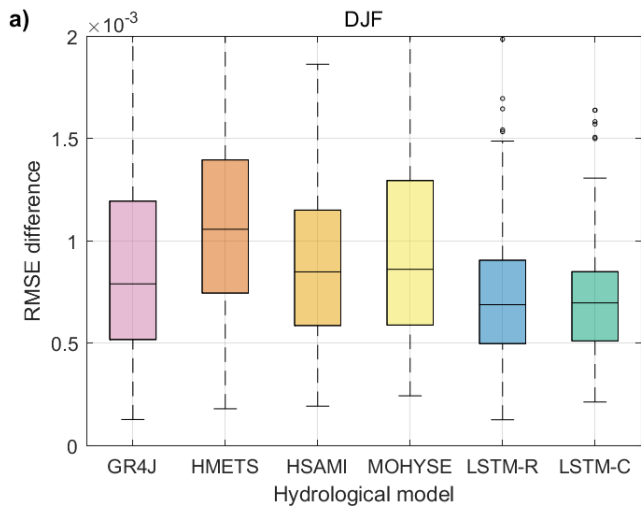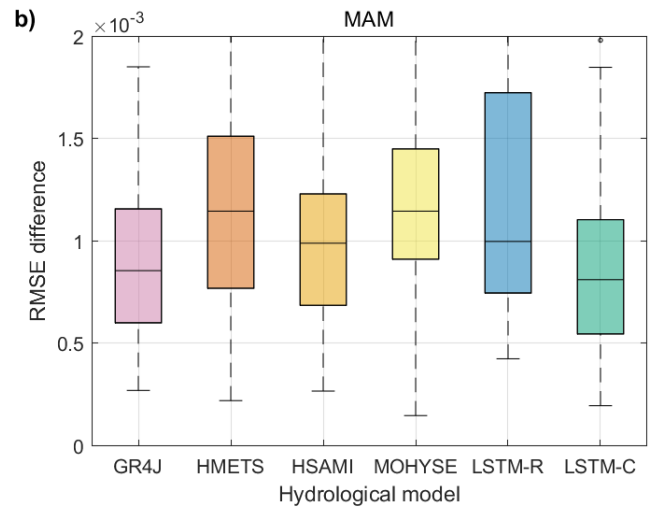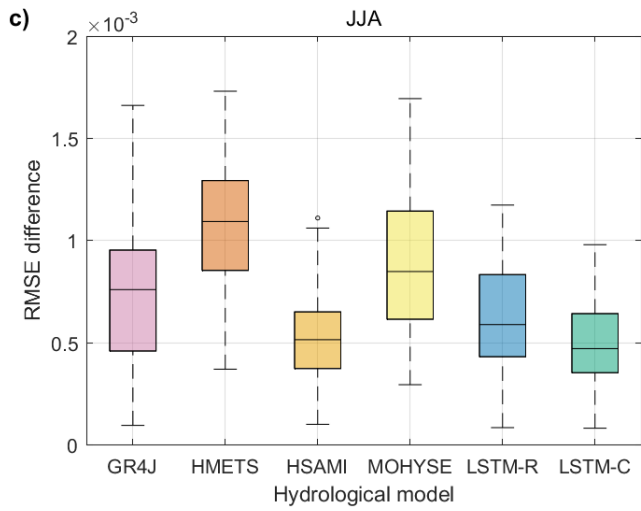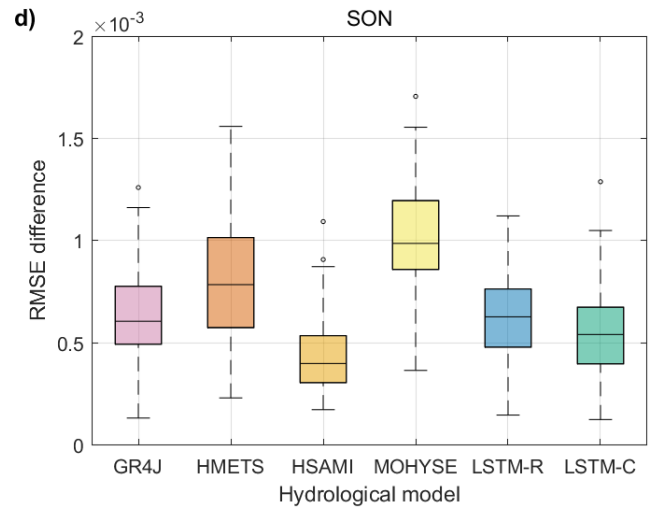

**Figure S7: Same as Figure 11, but on a seasonal basis.**



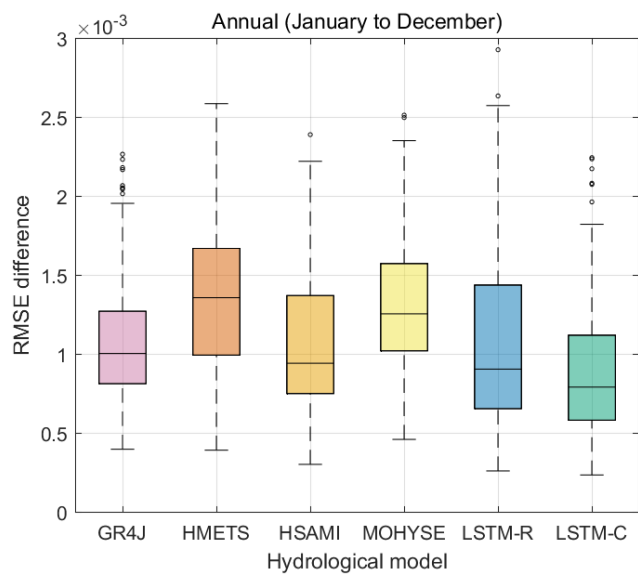

40 **Figure S8: Same as Figure 11, but the 20% increase in precipitation scenario.**

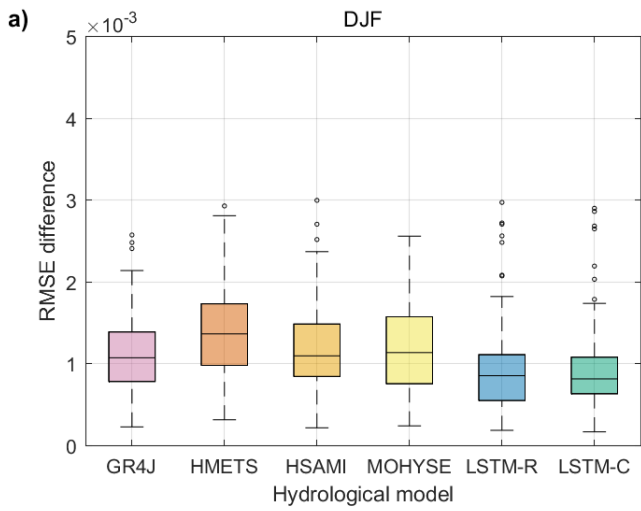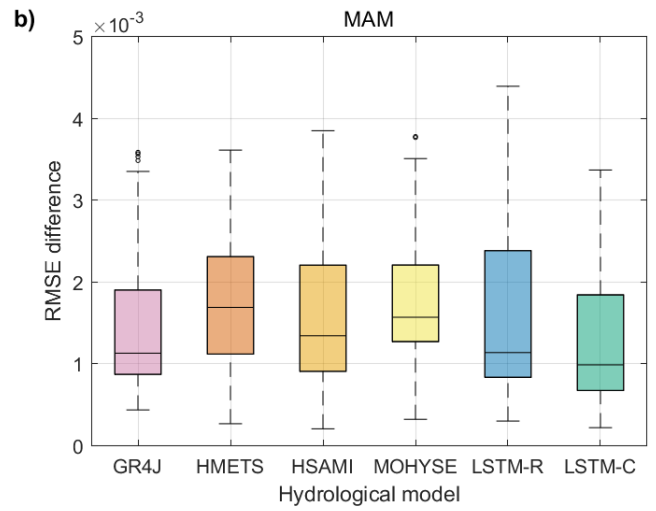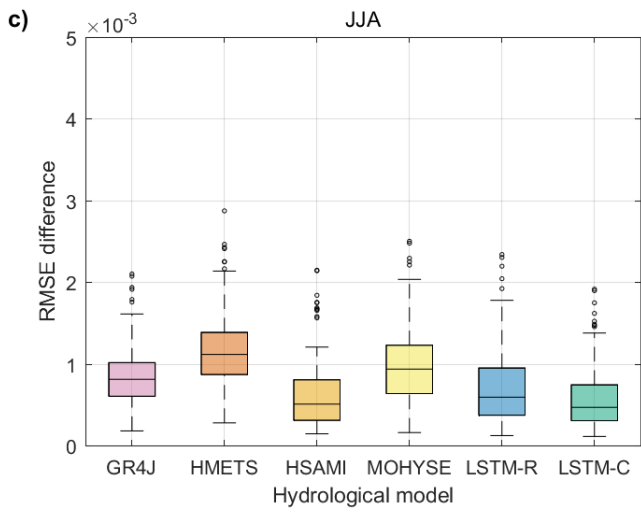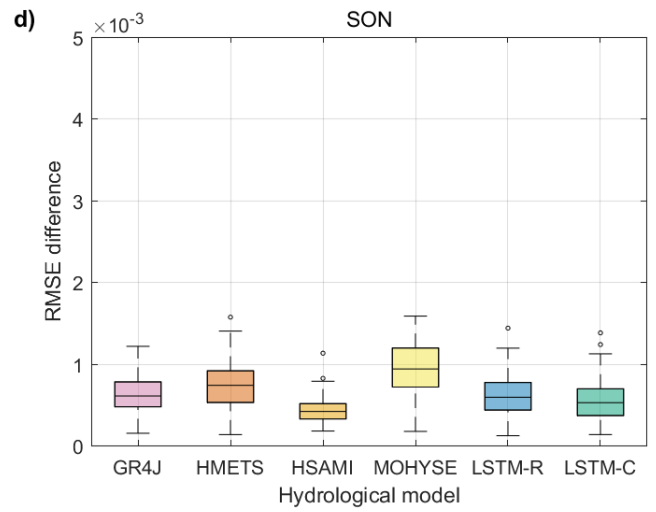

**Figure S9: Same as Figure S8, but on a seasonal basis.**

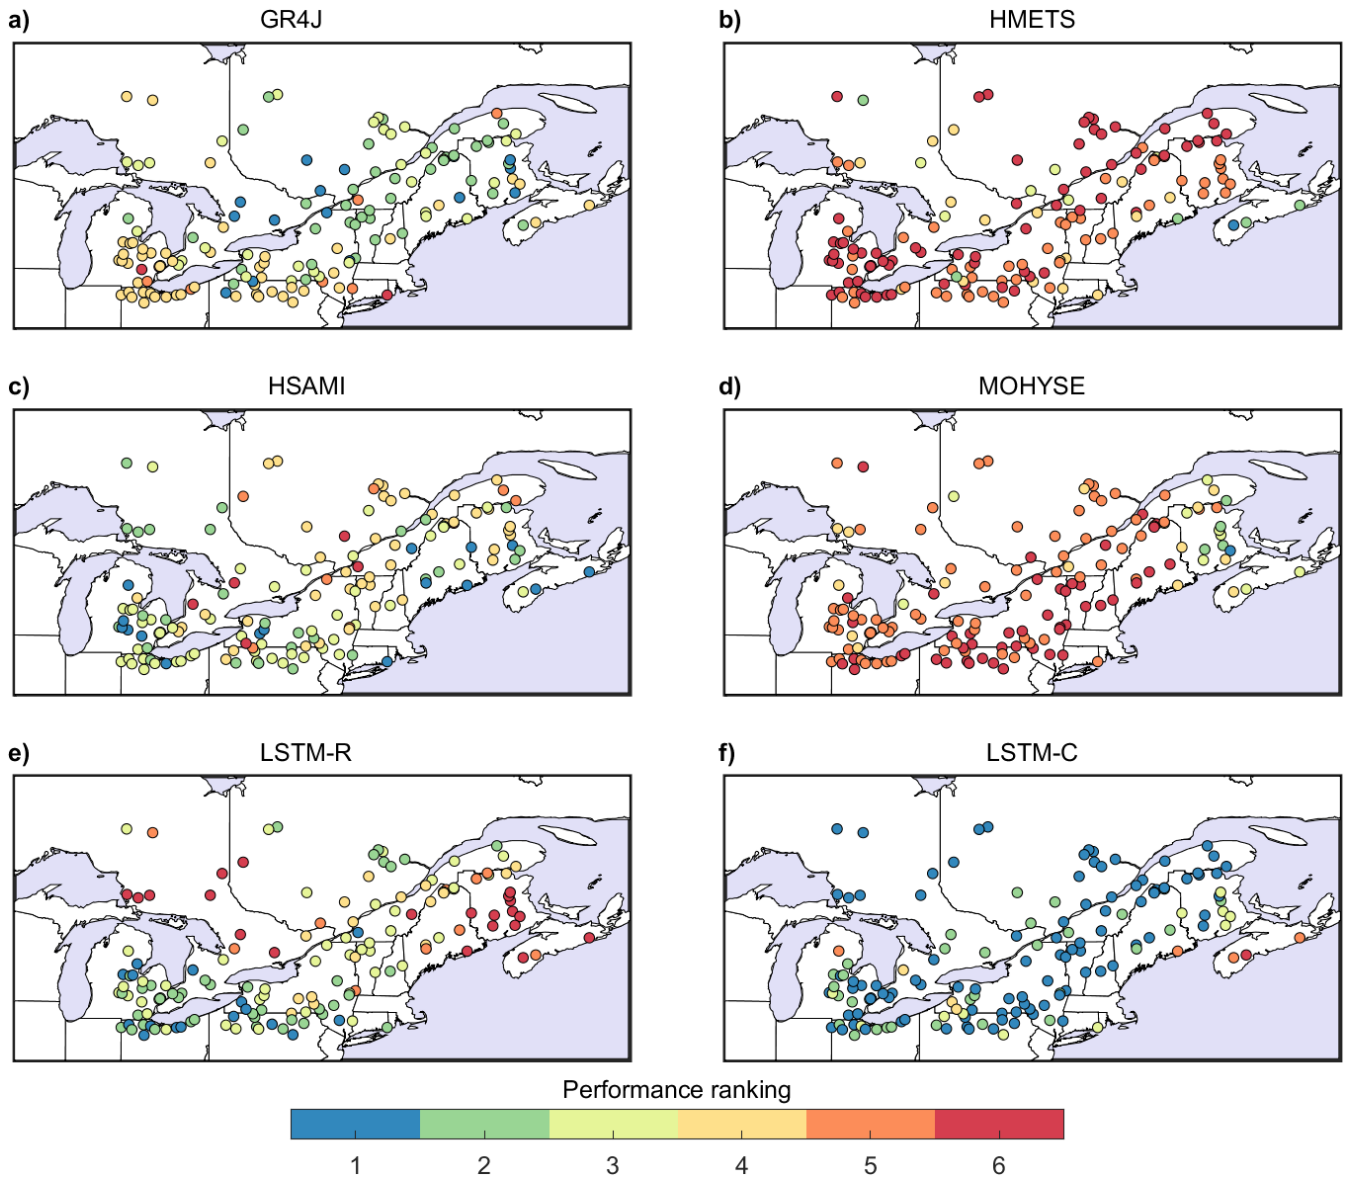

Figure S10: Same as Figure 11, but the 20% increase in precipitation scenario.
